# Supplementary material
Source: PubMed Central journal article supplement (PMC4442770)
Supplement: NIHMS645395-supplement.pdf [file NIHMS645395-supplement.pdf]

## Inflammatory Factors Mediate Vulnerability to a Social Stress-Induced Depressive-Like Phenotype in Passive Coping Rats

### Supplemental Information

**Table S1.** Stress-induced changes in gene expression in the locus coeruleus relative to control

| Symbol               | Entrez Gene Name                                                                       | UniGene   | Fold Change      | Location      | Type(s)     | Disease Involvement                                             |
|----------------------|----------------------------------------------------------------------------------------|-----------|------------------|---------------|-------------|-----------------------------------------------------------------|
| <b>Short Latency</b> |                                                                                        |           |                  |               |             |                                                                 |
| <b>Downregulated</b> |                                                                                        |           |                  |               |             |                                                                 |
| <i>ADRB1</i>         | Adrenoceptor beta 1                                                                    | Rn.87064  | $\hat{e}$ -4.759 | PM            | GPCR        | GI, Inflam, CVD, Nutri, Neuro, Psych, Renal, Immun, Endo, Metab |
| <i>NOS2</i>          | Nitric oxide synthase 2, inducible                                                     | Rn.10400  | $\hat{e}$ -3.355 | Cytoplasm     | Enzyme      | GI, Inflam, CVD, Nutri, Neuro, Psych, Renal, Immun, Endo, Metab |
| <i>GRM5</i>          | Glutamate receptor, metabotropic 5                                                     | Rn.29972  | $\hat{e}$ -3.345 | PM            | GPCR        | Nutri, CVD, Metab, Neuro, Psych                                 |
| <i>AGTR2</i>         | Angiotensin II receptor, type 2                                                        | Rn.162367 | $\hat{e}$ -3.016 | PM            | GPCR        | GI, CVD, Nutri, Neuro, Renal                                    |
| <i>CYP19A1</i>       | Cytochrome P450, family 19, subfamily A, polypeptide 1                                 | Rn.21402  | $\hat{e}$ -2.335 | Cytoplasm     | Enzyme      | GI, Inflam, CVD, Nutri, Neuro, Psych, Renal, Immun, Endo, Metab |
| <i>MMP9</i>          | Matrix metalloproteinase 9 (gelatinase B, 92kDa gelatinase, 92kDa type IV collagenase) | Rn.10209  | $\hat{e}$ -2.326 | Extracellular | Peptidase   | Nutri, Inflam, Immun, CVD, Metab, GI, Neuro, Renal              |
| <i>VCAM1</i>         | Vascular cell adhesion molecule 1                                                      | Rn.11267  | $\hat{e}$ -2.208 | PM            | TM receptor | Inflam, Immun, CVD, Metab, GI, Endo, Neuro, Renal               |
| <i>GRM7</i>          | Glutamate receptor, metabotropic 7                                                     | Rn.10409  | $\hat{e}$ -2.068 | PM            | GPCR        | GI, Neuro, Psych                                                |
| <i>ICAM1</i>         | Intercellular adhesion molecule 1                                                      | Rn.12     | $\hat{e}$ -1.995 | PM            | TM receptor | GI, Inflam, CVD, Nutri, Neuro, Psych, Renal, Immun, Endo, Metab |

| Symbol               | Entrez Gene Name                                    | UniGene  | Fold Change      | Location      | Type(s)     | Disease Involvement                                             |
|----------------------|-----------------------------------------------------|----------|------------------|---------------|-------------|-----------------------------------------------------------------|
| <i>COL1A1</i>        | Collagen, type I, alpha 1                           | Rn.2953  | $\hat{e}$ -1.786 | Extracellular | Other       | GI, Inflam, CVD, Neuro                                          |
| <i>IL1R1</i>         | Interleukin 1 receptor, type I                      | Rn.9758  | $\hat{e}$ -1.636 | PM            | TM receptor | GI, Inflam, CVD, Nutri, Neuro, Renal, Immun, Endo, Metab        |
| <b>Upregulated</b>   |                                                     |          |                  |               |             |                                                                 |
| <i>IL1R2</i>         | Interleukin 1 receptor, type II                     | Rn.10758 | $\hat{e}$ 7.976  | PM            | TM receptor | GI, Inflam, Immun, Endo, Metab                                  |
| <i>IL1B</i>          | Interleukin 1, beta                                 | Rn.9869  | $\hat{e}$ 3.993  | Extracellular | Cytokine    | GI, Inflam, CVD, Nutri, Neuro, Psych, Immun, Endo, Metab        |
| <i>LHCGR</i>         | Luteinizing hormone/<br>choriogonadotropin receptor | Rn.11216 | $\hat{e}$ 2.418  | PM            | GPCR        | CVD, Nutri, Endo                                                |
| <i>NPY1R</i>         | Neuropeptide Y receptor Y1                          | Rn.11642 | $\hat{e}$ 2.198  | PM            | GPCR        | Nutri, Immun, CVD, Metab                                        |
| <b>Long Latency</b>  |                                                     |          |                  |               |             |                                                                 |
| <b>Downregulated</b> |                                                     |          |                  |               |             |                                                                 |
| <i>NOS2</i>          | Nitric oxide synthase 2,<br>inducible               | Rn.10400 | $\hat{e}$ -3.932 | Cytoplasm     | Enzyme      | GI, Inflam, CVD, Nutri, Neuro, Psych, Renal, Immun, Endo, Metab |
| <i>NPY2R</i>         | Neuropeptide Y receptor Y2                          | Rn.64505 | $\hat{e}$ -3.664 | PM            | GPCR        | N/A*                                                            |
| <i>IL1B</i>          | Interleukin 1, beta                                 | Rn.9869  | $\hat{e}$ -3.199 | Extracellular | Cytokine    | GI, Inflam, CVD, Nutri, Neuro, Psych, Immun, Endo, Metab        |
| <i>EDN1</i>          | Endothelin 1                                        | Rn.10918 | $\hat{e}$ -2.794 | Extracellular | Cytokine    | GI, Inflam, CVD, Neuro, Renal                                   |
| <i>GRM5</i>          | Glutamate receptor,<br>metabotropic 5               | Rn.29972 | $\hat{e}$ -2.727 | PM            | GPCR        | Nutri, CVD, Metab, Neuro, Psych                                 |
| <i>ICAM1</i>         | Intercellular adhesion<br>molecule 1                | Rn.12    | $\hat{e}$ -2.571 | PM            | TM receptor | GI, Inflam, CVD, Nutri, Neuro, Psych, Renal, Immun, Endo, Metab |
| <i>DRD1</i>          | Dopamine receptor D1                                | Rn.24039 | $\hat{e}$ -2.321 | PM            | GPCR        | Nutri, CVD, Metab, GI, Endo, Neuro, Renal, Psych                |
| <i>TNF</i>           | Tumor necrosis factor                               | Rn.2275  | $\hat{e}$ -2.089 | Extracellular | Cytokine    | Nutri, Inflam, Immun, CVD, Metab, GI, Endo, Neuro, Renal, Psych |

| Symbol             | Entrez Gene Name                                                     | UniGene  | Fold Change | Location  | Type(s)                 | Disease Involvement                         |
|--------------------|----------------------------------------------------------------------|----------|-------------|-----------|-------------------------|---------------------------------------------|
| <i>EGR1</i>        | Early growth response 1                                              | Rn.9096  | ê-2.028     | Nucleus   | Transcription regulator | Inflam, Immun, CVD, GI, Neuro               |
| <i>SOCS1</i>       | Suppressor of cytokine signaling 1                                   | Rn.82754 | ê-1.815     | Cytoplasm | Other                   | Inflam, Immun, CVD, Metab, GI, Endo, Renal  |
| <i>KCNH8</i>       | Potassium voltage-gated channel, subfamily H (eag-related), member 8 | Rn.30029 | ê-1.686     | PM        | Ion channel             | N/A*                                        |
| <i>BCL2L1</i>      | BCL2-like 1                                                          | Rn.10323 | ê-1.681     | Cytoplasm | Other                   | Inflam, Immun, CVD, GI, Neuro               |
| <i>OPRK1</i>       | Opioid receptor, kappa 1                                             | Rn.89571 | ê-1.533     | PM        | GPCR                    | Nutri, Inflam, Immun, CVD, GI, Neuro, Psych |
| <b>Upregulated</b> |                                                                      |          |             |           |                         |                                             |
| <i>IL1R2</i>       | Interleukin 1 receptor, type II                                      | Rn.10758 | é4.31       | PM        | TM receptor             | GI, Inflam, Immun, Endo, Metab              |
| <i>NPY1R</i>       | Neuropeptide Y receptor Y1                                           | Rn.11642 | é1.745      | PM        | GPCR                    | Nutri, Immun, CVD, Metab                    |
| <i>UCP1</i>        | Uncoupling protein 1 (mitochondrial, proton carrier)                 | Rn.10281 | é1.615      | Cytoplasm | Transporter             | Metab                                       |
| <i>LHCGR</i>       | Luteinizing hormone/choriogonadotropin receptor                      | Rn.11216 | é1.550      | PM        | GPCR                    | CVD, Nutri, Endo                            |

Genes >1.5 fold differentially expressed vs. controls.

CVD, cardiovascular disease; Endo, endocrine system disorders; GI, gastrointestinal disease; GPCR, G-protein coupled receptor signaling; Immun, immunological disease; Inflam, inflammatory disease; Metab, metabolic disease; Neuro, neurological disease; Nutri, nutritional disease; PM, plasma membrane; Psych, psychological disorders; Renal, renal and urological disease; TM, transmembrane; \*N/A, no disease association was provided by IPA.

**Table S2.** Stress-induced changes in gene expression in the dorsal raphe relative to control

| Symbol               | Entrez Gene Name                                       | UniGene  | Fold Change | Location      | Type(s)                 | Disease Involvement                                             |
|----------------------|--------------------------------------------------------|----------|-------------|---------------|-------------------------|-----------------------------------------------------------------|
| <b>Short Latency</b> |                                                        |          |             |               |                         |                                                                 |
| <b>Downregulated</b> |                                                        |          |             |               |                         |                                                                 |
| <i>COL1A1</i>        | Collagen, type I, alpha 1                              | Rn.2953  | ê -7.234    | Extracellular | Other                   | GI, Inflam, CVD, Neuro                                          |
| <i>CYP19A1</i>       | Cytochrome P450, family 19, subfamily A, polypeptide 1 | Rn.21402 | ê -4.319    | Cytoplasm     | Enzyme                  | GI, Inflam, CVD, Nutri, Neuro, Psych, Renal, Immun, Endo, Metab |
| <i>IL1R2</i>         | Interleukin 1 receptor, type II                        | Rn.10758 | ê -3.766    | PM            | TM receptor             | GI, Inflam, Immun, Endo, Metab                                  |
| <i>TACR1</i>         | Tachykinin receptor 1                                  | Rn.89609 | ê -3.423    | PM            | GPCR                    | GI, Inflam, Nutri, Psych                                        |
| <i>AKT1</i>          | V-akt murine thymoma viral oncogene homolog 1          | Rn.11422 | ê -3.231    | Cytoplasm     | Kinase                  | GI, Inflam, CVD, Nutri, Neuro, Psych, Renal, Immun, Endo, Metab |
| <i>EDN1</i>          | Endothelin 1                                           | Rn.10918 | ê -2.783    | Extracellular | Cytokine                | GI, Inflam, CVD, Neuro, Renal                                   |
| <i>NPY2R</i>         | Neuropeptide Y receptor Y2                             | Rn.64505 | ê -2.616    | PM            | GPCR                    | N/A*                                                            |
| <i>IL1R1</i>         | Interleukin 1 receptor, type I                         | Rn.9758  | ê -2.412    | PM            | TM receptor             | GI, Inflam, CVD, Nutri, Neuro, Renal, Immun, Endo, Metab        |
| <i>LHCGR</i>         | Luteinizing hormone/choriogonadotropin receptor        | Rn.11216 | ê -2.310    | PM            | GPCR                    | CVD, Nutri, Endo                                                |
| <i>CCNE1</i>         | Cyclin E1                                              | Rn.15455 | ê -2.284    | Nucleus       | Transcription regulator | CVD                                                             |
| <i>GALR2</i>         | Galanin receptor 2                                     | Rn.9789  | ê -2.142    | PM            | GPCR                    | GI                                                              |
| <i>GRM1</i>          | Glutamate receptor, metabotropic 1                     | Rn.87787 | ê -2.123    | PM            | GPCR                    | GI, Neuro, Psych                                                |
| <i>S1PR2</i>         | Sphingosine-1-phosphate receptor 2                     | Rn.2491  | ê -2.104    | PM            | GPCR                    | Neuro, Immun                                                    |
| <i>ADORA2A</i>       | Adenosine A2a receptor                                 | Rn.11180 | ê -2.027    | PM            | GPCR                    | GI, Inflam, CVD, Nutri, Neuro, Renal, Immun                     |
| <i>JUN</i>           | Jun proto-oncogene                                     | Rn.93714 | ê -1.975    | Nucleus       | Transcription regulator | GI, Inflam, CVD, Neuro, Psych, Renal, Immun, Endo, Metab        |

| Symbol       | Entrez Gene Name                                                                      | UniGene   | Fold Change | Location      | Type(s)                 | Disease Involvement                                             |
|--------------|---------------------------------------------------------------------------------------|-----------|-------------|---------------|-------------------------|-----------------------------------------------------------------|
| <i>GRM7</i>  | Glutamate receptor, metabotropic 7                                                    | Rn.10409  | ê-1.929     | PM            | GPCR                    | GI, Neuro, Psych                                                |
| <i>AGTR2</i> | Angiotensin II receptor, type 2                                                       | Rn.162367 | ê-1.873     | PM            | GPCR                    | GI, CVD, Nutri, Neuro, Renal                                    |
| <i>NOS2</i>  | Nitric oxide synthase 2, inducible                                                    | Rn.10400  | ê-1.802     | Cytoplasm     | Enzyme                  | GI, Inflam, CVD, Nutri, Neuro, Psych, Renal, Immun, Endo, Metab |
| <i>CASR</i>  | Calcium-sensing receptor                                                              | Rn.10019  | ê-1.755     | PM            | GPCR                    | GI, Inflam, CVD, Neuro, Renal, Endo                             |
| <i>ADRB1</i> | Adrenoceptor beta 1                                                                   | Rn.87064  | ê-1.724     | PM            | GPCR                    | GI, Inflam, CVD, Nutri, Neuro, Psych, Renal, Immun, Endo, Metab |
| <i>GRM2</i>  | Glutamate receptor, metabotropic 2                                                    | Rn.9681   | ê-1.715     | PM            | GPCR                    | Neuro, Psych                                                    |
| <i>CTGF</i>  | Connective tissue growth factor                                                       | Rn.17145  | ê-1.702     | Extracellular | Growth factor           | GI, CVD, Neuro, Psych, Renal, Metab                             |
| <i>S1PR1</i> | Sphingosine-1-phosphate receptor 1                                                    | Rn.109455 | ê-1.696     | PM            | GPCR                    | GI, Inflam, Neuro, Immun                                        |
| <i>LPAR1</i> | Lysophosphatidic acid receptor 1                                                      | Rn.11200  | ê-1.680     | PM            | GPCR                    | GI, Neuro                                                       |
| <i>ICAM1</i> | Intercellular adhesion molecule 1                                                     | Rn.12     | ê-1.631     | PM            | TM receptor             | GI, Inflam, CVD, Nutri, Neuro, Psych, Renal, Immun, Endo, Metab |
| <i>OPRK1</i> | Opioid receptor, kappa 1                                                              | Rn.89571  | ê-1.623     | PM            | GPCR                    | GI, Inflam, CVD, Neuro, Psych, Renal, Immun                     |
| <i>PTGS2</i> | Prostaglandin-endoperoxide synthase 2 (prostaglandin G/H synthase and cyclooxygenase) | Rn.44369  | ê-1.585     | Cytoplasm     | Enzyme                  | GI, Inflam, CVD, Nutri, Neuro, Psych, Renal, Immun, Endo, Metab |
| <i>ELK4</i>  | ELK4, ETS-domain protein (SRF accessory protein 1)                                    | Rn.204345 | ê-1.575     | Nucleus       | Transcription regulator | GI                                                              |
| <i>AGT</i>   | Angiotensinogen (serpin peptidase inhibitor, clade A, member 8)                       | Rn.6319   | ê-1.527     | Extracellular | Growth factor           | GI, Inflam, CVD, Nutri, Neuro, Psych, Renal, Immun, Endo, Metab |

| Symbol               | Entrez Gene Name                                                | UniGene   | Fold Change | Location      | Type(s)       | Disease Involvement                                             |
|----------------------|-----------------------------------------------------------------|-----------|-------------|---------------|---------------|-----------------------------------------------------------------|
| <i>DRD2</i>          | Dopamine receptor D2                                            | Rn.87299  | ê-1.500     | PM            | GPCR          | N/A*                                                            |
| <b>Upregulated</b>   |                                                                 |           |             |               |               |                                                                 |
| <i>PTGDR</i>         | Prostaglandin D2 receptor (DP)                                  | Rn.220703 | ê2.707      | PM            | GPCR          | GI, Inflam, CVD, Neuro                                          |
| <i>IL1B</i>          | Interleukin 1, beta                                             | Rn.9869   | ê1.932      | Extracellular | Cytokine      | GI, Inflam, CVD, Nutri, Neuro, Psych, Immun, Endo, Metab        |
| <b>Long Latency</b>  |                                                                 |           |             |               |               |                                                                 |
| <b>Downregulated</b> |                                                                 |           |             |               |               |                                                                 |
| <i>NOS2</i>          | Nitric oxide synthase 2, inducible                              | Rn.10400  | ê-6.868     | Cytoplasm     | Enzyme        | GI, Inflam, CVD, Nutri, Neuro, Psych, Renal, Immun, Endo, Metab |
| <i>DRD2</i>          | Dopamine receptor D2                                            | Rn.87299  | ê-2.914     | PM            | GPCR          | N/A*                                                            |
| <i>AGT</i>           | Angiotensinogen (serpin peptidase inhibitor, clade A, member 8) | Rn.6319   | ê-2.826     | Extracellular | Growth factor | GI, Inflam, CVD, Nutri, Neuro, Psych, Renal, Immun, Endo, Metab |
| <i>AGTR2</i>         | Angiotensin II receptor, type 2                                 | Rn.162367 | ê-2.490     | PM            | GPCR          | GI, CVD, Nutri, Neuro, Renal                                    |
| <i>IL1B</i>          | Interleukin 1, beta                                             | Rn.9869   | ê-2.475     | Extracellular | Cytokine      | GI, Inflam, CVD, Nutri, Neuro, Psych, Immun, Endo, Metab        |
| <i>GRM7</i>          | Glutamate receptor, metabotropic 7                              | Rn.10409  | ê-2.392     | PM            | GPCR          | GI, Neuro, Psych                                                |
| <i>OPRD1</i>         | Opioid receptor, delta 1                                        | Rn.10310  | ê-1.952     | PM            | GPCR          | GI, Inflam, CVD, Nutri, Neuro, Psych, Immun                     |
| <i>S1PR1</i>         | Sphingosine-1-phosphate receptor 1                              | Rn.109455 | ê-1.662     | PM            | GPCR          | GI, Inflam, Neuro, Immun                                        |
| <i>LHCGR</i>         | Luteinizing hormone/choriogonadotropin receptor                 | Rn.11216  | ê-1.524     | PM            | GPCR          | CVD, Nutri, Endo                                                |

| Symbol                    | Entrez Gene Name                | UniGene   | Fold Change | Location | Type(s)     | Disease Involvement                                             |
|---------------------------|---------------------------------|-----------|-------------|----------|-------------|-----------------------------------------------------------------|
| <b><i>Upregulated</i></b> |                                 |           |             |          |             |                                                                 |
| PTGDR                     | Prostaglandin D2 receptor (DP)  | Rn.220703 | €4.392      | PM       | GPCR        | GI, Inflam, CVD, Neuro                                          |
| IL1R2                     | Interleukin 1 receptor, type II | Rn.10758  | €2.767      | PM       | TM receptor | GI, Inflam, Immun, Endo, Metab                                  |
| ADRB2                     | Adrenoceptor beta 2, surface    | Rn.10206  | €1.987      | PM       | GPCR        | GI, Inflam, CVD, Nutri, Neuro, Psych, Renal, Immun, Endo, Metab |
| CASR                      | Calcium-sensing receptor        | Rn.10019  | €1.793      | PM       | GPCR        | GI, Inflam, CVD, Neuro, Renal, Endo                             |

Genes >1.5 fold differentially expressed vs. controls.

CVD, cardiovascular disease; Endo, endocrine system disorders; GI, gastrointestinal disease; GPCR, G-protein coupled receptor signaling; Immun, immunological disease; Inflam, inflammatory disease; Metab, metabolic disease; Neuro, neurological disease; Nutri, nutritional disease; PM, plasma membrane; Psych, psychological disorders; Renal, renal and urological disease; TM, transmembrane; \*N/A, no disease association was provided by IPA.
